# Supplementary material
Source: publisher figshare collection journal article supplement (https://springernature.figshare.com/ndownloader/files/18037076)
Supplement: Supplementary file 1 [file 18037076]

## Sheet: Table S4
Table S4: The QTLs of VW in intraspecific upland cotton populations and interspecific Gh × Gb populations.
File	Map	QTL	Chromosome	Trait	LOD	R-sq	SimMap	Position	Left	Right
upland	consensusmap	QTL-BNL2599	1	VW	3	5.97	N	1.633	0	14.17
upland	consensusmap	QTL-BNL2599	1	VW	3	5.97	N	1.633	0	14.17
upland	consensusmap	qVW-A1-1	1	VW	3.99	24.27	N	24.61	24	31
upland	consensusmap	qVW-A1-1	1	VW	3.11	12.45	N	25.81	24.6	30.2
upland	consensusmap	VW4.u	2	VW	1.2593	13.78	N	96.1	90.05	98.9
upland	consensusmap	VW4.u	2	VW	1.2593	13.78	N	96.1	90.05	98.9
upland	consensusmap	QTL-NAU3828	5	VW	3	3.87	N	24.1	22.11	25.63
upland	consensusmap	QTL-NAU3828	5	VW	3	3.87	N	24.1	22.11	25.63
upland	consensusmap	qVW-A6-1	6	VW	6.41	44.61	N	3.71	1.4	5.4
upland	consensusmap	qDR52T2-c08	8	VW	2.88	13.81	N	21	20.8	21.6
upland	consensusmap	qIL52T2-c08	8	VW	2.78	13.39	N	21	20.8	21.6
upland	consensusmap	qDR52T2-c08	8	VW	2.88	13.81	N	21	20.8	21.6
upland	consensusmap	qIL52T2-c08	8	VW	2.78	13.39	N	21	20.8	21.6
upland	consensusmap	QTL-NAU3201	8	VW	3	5.24	N	38.4	35.41	39.92
upland	consensusmap	QTL-NAU3201	8	VW	3	5.24	N	38.4	35.41	39.92
upland	consensusmap	QTI-NAU3499	8	VW	3	8.71	N	65.3	60.15	67.85
upland	consensusmap	QTI-NAU3499	8	VW	3	8.71	N	65.3	60.15	67.85
upland	consensusmap	QTL-BNL-3255	8	VW	3	4.11	N	76.5	67.85	89.71
upland	consensusmap	QTL-BNL-3255	8	VW	3	4.11	N	76.5	67.85	89.71
upland	consensusmap	qVW-A9-1	9	VW	7.61	31.26	N	2.61	2.6	4
upland	consensusmap	VWQTL.c	9	VW	2.97	13.8	N	114.2	111	117.4
upland	consensusmap	VWQTL.c	9	VW	2.97	13.8	N	114.2	111	117.4
upland	consensusmap	QTL-DPL0222	9	VW	3	3.71	N	137.829	132.829	142.829
upland	consensusmap	QTL-DPL0222	9	VW	3	3.71	N	137.829	132.829	142.829
upland	consensusmap	qDR31T2-c11	11	VW	1.83	9.23	N	0	0	4.6
upland	consensusmap	qDR31T2-c11	11	VW	1.83	9.23	N	0	0	4.6
upland	consensusmap	qVW-A11-1	11	VW	6.29	28.42	N	23.51	23.5	23.7
upland	consensusmap	qDR70T1-c13	13	VW	2.57	12.7	N	52	51.5	54.8
upland	consensusmap	qDR70T1-c13	13	VW	2.57	12.7	N	52	51.5	54.8
upland	consensusmap	qDL52T2-c15	15	VW	1.98	7.6	N	0	0	2.4
upland	consensusmap	qDL52T2-c15	15	VW	1.98	7.6	N	0	0	2.4
upland	consensusmap	qVW-D2-1	15	VW	3.14	8.01	N	58.51	58	59.2
upland	consensusmap	qV-BP2S2-D7-1	16	VW	5.05	5.8	N	0	0	9
upland	consensusmap	qV-T9S2-D7-1	16	VW	10.9	16.5	N	2	0	13
upland	consensusmap	qV-VD8S2-D7-1	16	VW	8.27	12.1	N	8	0	18
upland	consensusmap	VW3.u	16	VW	1.7324	10.8	N	9.8	0	12.82
upland	consensusmap	VW3.u	16	VW	1.7324	10.8	N	9.8	0	12.82
upland	consensusmap	qV-VD8S1-D7-1	16	VW	18.35	30.8	N	12	6.9	18
upland	consensusmap	VW1.u	16	VW	3.5986	16.53	N	13.3	12.82	23.97
upland	consensusmap	VW2.u	16	VW	2.0693	10.27	N	13.3	12.82	23.97
upland	consensusmap	VW1.u	16	VW	3.5986	16.53	N	13.3	12.82	23.97
upland	consensusmap	VW2.u	16	VW	2.0693	10.27	N	13.3	12.82	23.97
upland	consensusmap	qV-MIXS1-D7-1	16	VW	14.2	24.6	N	14	7.6	19.3
upland	consensusmap	qV-VD8S2-D7-2	16	VW	26.13	32.1	N	28.8	23.9	40.9
upland	consensusmap	qV-T9S2-D7-2	16	VW	8.3	10.2	N	28.8	24.7	36.1
upland	consensusmap	qV-BP2S2-D7-2	16	VW	11.03	13.6	N	32	30.3	37.7
upland	consensusmap	qV-T9S1-D7-1	16	VW	16.3	19.1	N	32	29.5	37.7
upland	consensusmap	qV-MIXM-D7-1	16	VW	22.99	23.4	N	32	30.3	35.6
upland	consensusmap	qV-BP2S1-D7-1	16	VW	18.87	24.1	N	44	39.9	50.1
upland	consensusmap	qV-T9M-D7-1	16	VW	16.94	24	N	45.3	42.5	71.9
upland	consensusmap	qV-VD8M-D7-1	16	VW	20.6	31.5	N	57.3	52.9	60.9
upland	consensusmap	QTL-NAU2627	16	VW	3	3.7	N	62.301	57.52	64.16
upland	consensusmap	QTL-NAU2627	16	VW	3	3.7	N	62.301	57.52	64.16
upland	consensusmap	qV-BP2M-D7-1	16	VW	24.41	32	N	62.9	58.5	72.2
upland	consensusmap	qV-VD8M-D7-2	16	VW	19.32	27.7	N	62.9	60.9	67.2
upland	consensusmap	qV-MIXS2-D7-1	16	VW	24.37	33.4	N	62.9	58.7	70.4
upland	consensusmap	qDR30T1-c17	17	VW	2.68	13.08	N	10	5.8	10.9
upland	consensusmap	qDR30T1-c17	17	VW	2.68	13.08	N	10	5.8	10.9
upland	consensusmap	QTL-BNL1606	17	VW	3	5.26	N	51.762	36.07	53.42
upland	consensusmap	QTL-BNL1606	17	VW	3	5.26	N	51.762	36.07	53.42
upland	consensusmap	qDR85T1-c19	19	VW	2.2	10.64	N	1	0	1
upland	consensusmap	qDR85T1-c19	19	VW	2.2	10.64	N	1	0	1
upland	consensusmap	qDL52T2-c19	19	VW	5.18	24.74	N	15	14.4	15.1
upland	consensusmap	qDL52T2-c19	19	VW	5.18	24.74	N	15	14.4	15.1
upland	consensusmap	qDR15T1-c19	19	VW	2.36	13.34	N	22	16.4	24
upland	consensusmap	qDR15T1-c19	19	VW	2.36	13.34	N	22	16.4	24
upland	consensusmap	QTL-BNL4069	19	VW	3	6.19	N	36.8	32.17	40.39
upland	consensusmap	QTL-BNL4069	19	VW	3	6.19	N	36.8	32.17	40.39
upland	consensusmap	QTL-JESPR0001	19	VW	3	4.79	N	123.567	118.37	124.33
upland	consensusmap	QTL-JESPR0001	19	VW	3	4.79	N	123.567	118.37	124.33
upland	consensusmap	qIL52T2-c20	20	VW	2.03	10.22	N	0	0	3.3
upland	consensusmap	qIL52T2-c20	20	VW	2.03	10.22	N	0	0	3.3
upland	consensusmap	QTL-BNL3646	20	VW	3	3.17	N	3.47	0	14.21
upland	consensusmap	QTL-BNL3646	20	VW	3	3.17	N	3.47	0	14.21
upland	consensusmap	qDR15T1-c20	20	VW	2.7	12.85	N	15	14.6	16.3
upland	consensusmap	qDR15T1-c20	20	VW	2.7	12.85	N	15	14.6	16.3
upland	consensusmap	QTL-NAU3574	20	VW	3	5.06	N	58.598	56.27	59.2
upland	consensusmap	QTL-NAU3574	20	VW	3	5.06	N	58.598	56.27	59.2
upland	consensusmap	qDR52T2-c21	21	VW	1.8	8.92	N	1	0.4	1.2
upland	consensusmap	qIL52T2-c21	21	VW	2.41	11.7	N	1	0.4	1.2
upland	consensusmap	qDR52T2-c21	21	VW	1.8	8.92	N	1	0.4	1.2
upland	consensusmap	qIL52T2-c21	21	VW	2.41	11.7	N	1	0.4	1.2
upland	consensusmap	QTL-BNL3649	21	VW	3	5.66	N	10.8	6.37	12.31
upland	consensusmap	QTL-BNL3649	21	VW	3	5.66	N	10.8	6.37	12.31
upland	consensusmap	qVW-D9-1	22	VW	4.47	15.46	N	3.91	2.8	4.4
upland	consensusmap	qVW-D9-1	22	VW	23.53	55.99	N	3.91	2.8	4.4
upland	consensusmap	qVW-D9-1	22	VW	32.6	79.57	N	3.91	2.8	4.4
upland	consensusmap	qV-BP2S1-D9-1	23	VW	19	24.5	N	0	0	1.9
upland	consensusmap	qV-BP2S2-D9-1	23	VW	16.06	19.8	N	0	0	4.9
upland	consensusmap	qV-MIXS1-D9-1	23	VW	16.51	23.1	N	5.2	3.5	10
upland	consensusmap	qV-BP2S2-D9-2	23	VW	4.69	7.8	N	7.2	5.2	9.2
upland	consensusmap	qV-T9M-D9-1	23	VW	12.86	19.3	N	7.2	5.2	10.5
upland	consensusmap	qV-MIXM-D9-1	23	VW	4.79	9	N	7.2	4.8	9.2
upland	consensusmap	qV-VD8M-D9-1	23	VW	8.63	13.1	N	9.2	6	10.9
upland	consensusmap	qV-T9M-D9-2	23	VW	7.43	11.8	N	13	11	20.1
upland	consensusmap	qV-MIXS1-D9-2	23	VW	6.39	12.7	N	13	11.4	22.8
upland	consensusmap	qV-VD8M-D9-2	23	VW	14.63	18.6	N	15	13	16.1
upland	consensusmap	qV-MIXM-D9-2	23	VW	29.4	33.2	N	15.4	14.9	16.4
upland	consensusmap	qV-VD8S1-D9-1	23	VW	8.7	11.8	N	18	17.4	20.3
upland	consensusmap	qV-T9S1-D9-1	23	VW	15.9	20.2	N	20	18	21.2
upland	consensusmap	qV-MIXS2-D9-1	23	VW	6.82	9.7	N	20	10	22
upland	consensusmap	qV-MIXM-D9-3	23	VW	5.89	8.9	N	22.3	20.3	23.3
upland	consensusmap	qV-VD8M-D9-3	23	VW	7.85	11.6	N	25.3	21.1	27.9
upland	consensusmap	qV-VD8S2-D9-1	23	VW	10.26	16.8	N	25.3	23.2	31
upland	consensusmap	qV-T9S1-D9-2	23	VW	8.82	13	N	25.3	23.3	28.2
upland	consensusmap	qV-T9S2-D9-1	23	VW	12.46	18.8	N	25.3	23.3	29.5
upland	consensusmap	qV-VD8S1-D9-2	23	VW	12.57	16.5	N	27.3	25.3	28.8
upland	consensusmap	qV-MIXS2-D9-2	23	VW	17.06	20.6	N	28.3	27.1	29.6
upland	consensusmap	qV-BP2M-D9-1	23	VW	20.11	25.3	N	36.6	35.6	39.5
upland	consensusmap	qV-VD8S1-D9-3	23	VW	9.41	11.9	N	36.6	36.3	42.5
upland	consensusmap	qV-VD8S2-D9-2	23	VW	26.13	32.1	N	36.6	35.6	41.3
upland	consensusmap	qV-VD8S2-D9-3	23	VW	7.92	15.7	N	48.1	47.5	51.5
upland	consensusmap	QTL-NAU2954	23	VW	3	5.42	N	114.846	113.5	119.3
upland	consensusmap	QTL-NAU2954	23	VW	3	5.42	N	114.846	113.5	119.3
upland	consensusmap	qDR52T2-c24	24	VW	2.45	11.29	N	0	0	3.5
upland	consensusmap	qIL52T2-c24	24	VW	2.56	11.96	N	0	0	3.5
upland	consensusmap	qDR52T2-c24	24	VW	2.45	11.29	N	0	0	3.5
upland	consensusmap	qIL52T2-c24	24	VW	2.56	11.96	N	0	0	3.5
upland	consensusmap	qIL52T2-c25	25	VW	2.59	12.36	N	5	4.7	6.9
upland	consensusmap	qIL52T2-c25	25	VW	2.59	12.36	N	5	4.7	6.9
upland	consensusmap	qDR30T1-c26	26	VW	2.48	12.76	N	0	0	8.6
upland	consensusmap	qDR30T1-c26	26	VW	2.48	12.76	N	0	0	8.6
upland	consensusmap	qDR52T2-c26	26	VW	1.71	8.97	N	8	0	8.4
upland	consensusmap	qDL52T2-c26	26	VW	1.82	7.51	N	8	0	8.6
upland	consensusmap	qDR52T2-c26	26	VW	1.71	8.97	N	8	0	8.4
upland	consensusmap	qDL52T2-c26	26	VW	1.82	7.51	N	8	0	8.6
inter	consensusmap	qVW-C1-2	1	VW	4.2	0	N	89.5	0	0
inter	consensusmap	qVWR-06-c2-1	2	VW	3.32	9.9	N	2	1.2	7.7
inter	consensusmap	qVWI-08-c2-1	2	VW	2.93	32.38	N	27	22.2	56.2
inter	consensusmap	qVWR12-c4.1-1	4	VW	3	12	N	0	0	4
inter	consensusmap	qVWI12-c4.1-2	4	VW	3	14.7	N	0	0	3
inter	consensusmap	qVWR-08-c4-1	4	VW	3.82	35.43	N	7	0	17.7
inter	consensusmap	qVWI-08-c4-1	4	VW	4.19	41.98	N	7	0	17.7
inter	consensusmap	qVL-A5-2BC1S2592	5	VW	2.11	11	N	13.68	3.9	36.1
inter	consensusmap	qVW-C5-1	5	VW	3.3	0	N	30.5	0	0
inter	consensusmap	qVW-C5-2	5	VW	6.2	0	N	32.3	0	0
inter	consensusmap	qVL-A5-2F2	5	VW	3.31	12.3	N	92.55	83.8	96.3
inter	consensusmap	qVL-A5-1BC1S2VD8	5	VW	2.57	10.5	N	93.03	88.4	94.2
inter	consensusmap	qVV-A5-1BC1S2VD8	5	VW	3.43	12.2	N	93.03	89.6	94.6
inter	consensusmap	qVL-A5-1BC1S2592	5	VW	2.12	9.9	N	96.6	93.4	113.4
inter	consensusmap	qVL-A5-1F2	5	VW	2.35	8	N	118.94	114.6	120.2
inter	consensusmap	qVL-A7-1F2	7	VW	2.1	8.1	N	91.14	80.8	106
inter	consensusmap	qVV-A7-1F2	7	VW	4.08	14	N	91.14	84.5	93.9
inter	consensusmap	qVL-A8-1F2	8	VW	2.5	8.4	N	49.35	32.8	53.2
inter	consensusmap	qVV-A8-1BC1S2BP2	8	VW	4.48	16.1	N	53.47	52.1	59.1
inter	consensusmap	qVW-C8-1	8	VW	3	0	N	67.4	0	0
inter	consensusmap	qVW-C8-2	8	VW	3.3	0	N	79.7	0	0
inter	consensusmap	qVV-A9-1F2	9	VW	2.62	7.7	N	45.28	43	54.8
inter	consensusmap	qVWI-07-c9-1	9	VW	4.22	25.04	N	59	52	62.4
inter	consensusmap	qVWR-06-c12-1	12	VW	3.25	10.15	N	16	15.8	22.7
inter	consensusmap	qVW-C13-1	13	VW	3.4	0	N	47.3	0	0
inter	consensusmap	qVWI-09-c13-1	13	VW	2.83	25.07	N	74	48.9	93.6
inter	consensusmap	qVV-D5-1BC1S2592	19	VW	2.04	8.5	N	0.01	0	25.4
inter	consensusmap	qVL-D5-1BC1S2592	19	VW	2.44	14.1	N	22.79	9.1	34.1
inter	consensusmap	qVWI12-c19.1	19	VW	3	18.6	N	30.7	29.7	32
inter	consensusmap	qVV-D5-1BC1S2VD8	19	VW	3.03	10.6	N	50.38	35.3	62.3
inter	consensusmap	qVW-C20-1	20	VW	3.6	0	N	22.2	0	0
inter	consensusmap	qVV-D11-BC1S2VD8	21	VW	3.43	12.2	N	20.01	1	44
inter	consensusmap	qVV-D11-BC1S2592	21	VW	3.4	22.3	N	93.43	84.7	95.6
inter	consensusmap	qVWR-06-c21-1	21	VW	4.42	17.17	N	106	102.7	108.2
inter	consensusmap	qVL-D4-1BC1S2BP2	22	VW	5.49	20.3	N	0.01	0	5.2
inter	consensusmap	qVV-D4-1BC1S2BP2	22	VW	2.33	7.8	N	0.01	0	11.4
inter	consensusmap	qVWI-08-c22-1	22	VW	2.86	40.39	N	87	76.3	99.1
inter	consensusmap	qVWR-09-c23-1	23	VW	2.99	14.18	N	80	66.9	90.4
inter	consensusmap	q7.22-4	23	VW	3.66	28.83	N	80.8	73.3	88.3
inter	consensusmap	q8.24-1	24	VW	3.12	26.63	N	16.65	0	33.3
inter	consensusmap	q7.22-3	26	VW	3.49	14.95	N	41.95	30.6	53.3
inter	consensusmap	q7.22-5	26	VW	3.78	11.81	N	45.45	35.8	55.1
